# Supplementary material for: The receptor tyrosine kinase AXL promotes migration and invasion in colorectal cancer
Source: PubMed Central journal article supplement (PMC5519024; doi:10.1371/journal.pone.0179979), 2017-07-20
Supplement: pone.0179979.s001.pdf [file pone.0179979.s001.pdf]

## List of Primers

*AXL* forward 5'-CCAGGACACCCCAGAGGTGCTAAT-3'

*AXL* reverse 5'-TGGTGGACTGGCTGTGCTTGC-3'

*MERTK* forward 5'-GCCGTCACCAGAGGGGGAGT-3'

*MERTK* reverse 5'-TCTACCCAACCGTGTGCAGGGA-3'

*TYRO3* forward 5'-GCTAACGGCCCTGGTGACGG-3'

*TYRO3* reverse 5'-AGGCTTGCCCAAACCGCGTC-3'

*EEF1A* forward 5'-TCGGGCAAGTCCACCACTAC-3',

*EEF1A* reverse 5'-CCAAGACCCAGGCATACTTGA-3'

*ACTIN* forward 5'-CGAGCACAGAGCCTCGCCTT-3'

*ACTIN* reverse 5'-CATCATCCATGGTGAGCTGGCGG-3'
