# Supplementary material for: The receptor tyrosine kinase AXL promotes migration and invasion in colorectal cancer
Source: PubMed Central journal article supplement (PMC5519024; doi:10.1371/journal.pone.0179979), 2017-07-20
Supplement: pone.0179979.s002.pdf [file pone.0179979.s002.pdf]

| GO term BP FAT                          | Number of genes | P value |
|-----------------------------------------|-----------------|---------|
| 1. cell adhesion                        | 152             | 1.9E-52 |
| 2. biological adhesion                  | 152             | 2.3E-52 |
| 3. response to wounding                 | 90              | 2.2E-22 |
| 4. extracellular matrix organization    | 35              | 3.1E-18 |
| 5. extracellular structure organization | 42              | 4.2E-17 |
| 6. vascular development                 | 52              | 9.9E-17 |
| 7. blood vessel development             | 50              | 1.0E-15 |
| 8. cell motion                          | 71              | 1.2E-14 |
| 9. skeletal system development          | 52              | 2.6E-12 |
| 10. inflammatory response               | 52              | 5.4E-12 |
| 11. defense response                    | 77              | 9.0E-12 |
| 12. regulation of cell motion           | 38              | 1.3E-11 |
| 13. regulation of cell migration        | 35              | 2.2E-11 |
| 14. cell-cell adhesion                  | 46              | 2.7E-11 |
| 15. cell migration                      | 46              | 2.7E-11 |

#### KEGG Pathway

|                                        |    |         |
|----------------------------------------|----|---------|
| 1. ECM-receptor interaction            | 35 | 1.1E-20 |
| 2. Focal adhesion                      | 47 | 4.2E-16 |
| 3. Cell adhesion molecules (CAMs)      | 30 | 4.6E-10 |
| 4. Complement and coagulation cascades | 18 | 3.7E-7  |
| 5. Regulation of actin cytoskeleton    | 31 | 9.4E-6  |
