# Supplementary material for: The receptor tyrosine kinase AXL promotes migration and invasion in colorectal cancer
Source: PubMed Central journal article supplement (PMC5519024; doi:10.1371/journal.pone.0179979), 2017-07-20
Supplement: pone.0179979.s003.pdf [file pone.0179979.s003.pdf]

| GO term BP FAT                                         | Number of genes | P value |
|--------------------------------------------------------|-----------------|---------|
| 1. regulation of establishment of protein localization | 4               | 1.9E-3  |
| 2. regulation of protein localization                  | 4               | 2.8E-3  |
| 3. response to wounding                                | 6               | 4.2E-3  |
| 4. phagocytosis                                        | 3               | 4.4E-3  |
| 5. phospholipid translocation                          | 2               | 8.3E-3  |
