# Supplementary material for: The receptor tyrosine kinase AXL promotes migration and invasion in colorectal cancer
Source: PubMed Central journal article supplement (PMC5519024; doi:10.1371/journal.pone.0179979), 2017-07-20

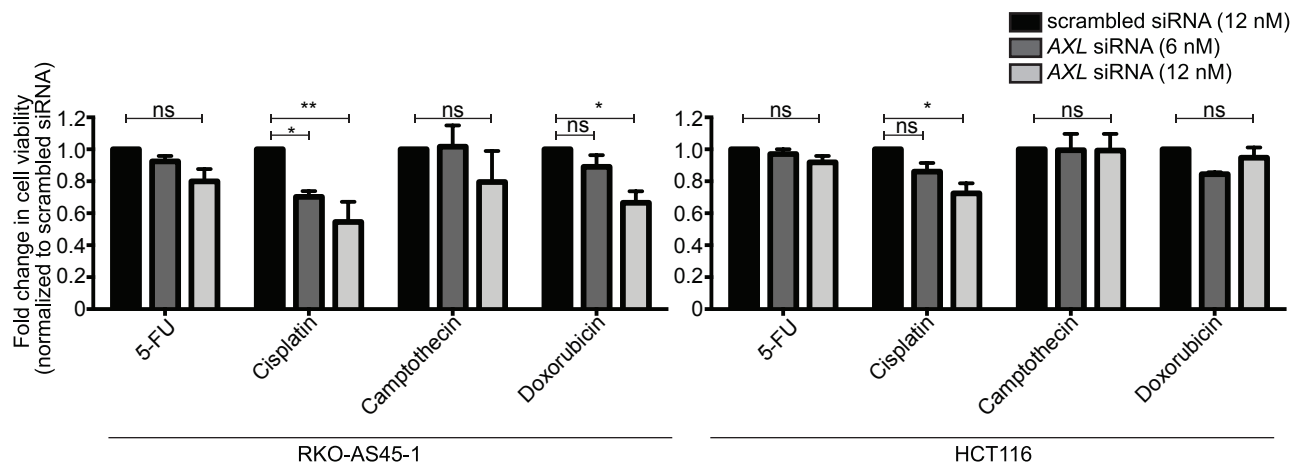

Supplement: pone.0179979.s008.pdf [file pone.0179979.s008.pdf]
